# Supplementary material for: Oncogenic but non-essential role of N-myc downstream regulated gene 1 in the progression of esophageal squamous cell carcinoma
Source: PubMed Central journal article supplement — Cancer Biol Ther. 2013 Feb 1;14(2):164–74. doi: 10.4161/cbt.22956 (PMC3571998; doi:10.4161/cbt.22956), 2013-02-01

## **Supplemental Material to:**

**Wei Wei, Jacqueline Bracher-Manecke, Xiaohang Zhao,  
Neil Davies, Lanping Zhou, Runna Ai, Lisa Oliver, Francois  
Vallette and Denver Hendricks**

**Oncogenic but non-essential role of N-myc downstream  
regulated gene 1 in the progression of esophageal  
squamous cell carcinoma**

**Cancer Biology & Therapy 2012; 14(2)**

**<http://dx.doi.org/10.4161/cbt.22956>**

**<http://www.landesbioscience.com/journals/cbt/article/22956/>**

## Supplementary figures legend

**Figure S1.** Flow cytometry analysis of A, the internal GFP intensity of the transfectant "pools" with NDRG1 shRNA, showing its purity and stability immediately after transduction (six passages) as well as 1.5 month thereafter (twenty-three passages); and B, propidium iodide stained cells for DNA content analysis to detect the effect of ectopic NDRG1 alteration on cell cycle. Percentage of each phase analyzed by the CXP software of Beckman Coulter Cytomics FC500 Flow Cytometer is shown on each histogram. A representative result from three independent experiments is shown.

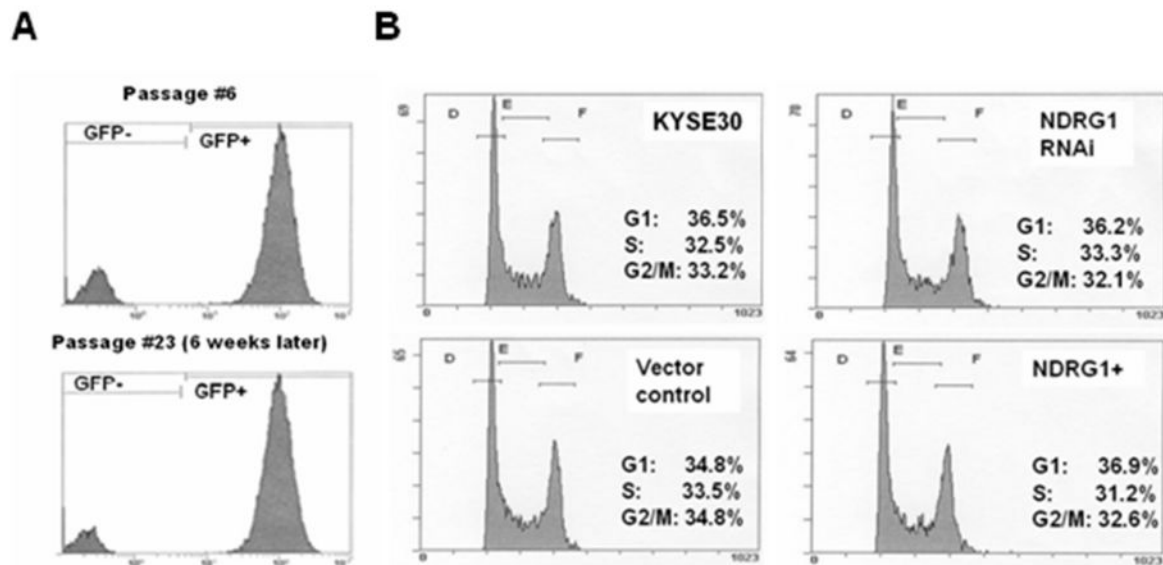

**Figure S2.** Anchorage independent proliferation of wild type KYSE30 cells and transfectants with altered NDRG1 expression level. MTS assay was performed and measured at 490 nm. Each point represents the mean of four readings; Bars,  $\pm$ SD.

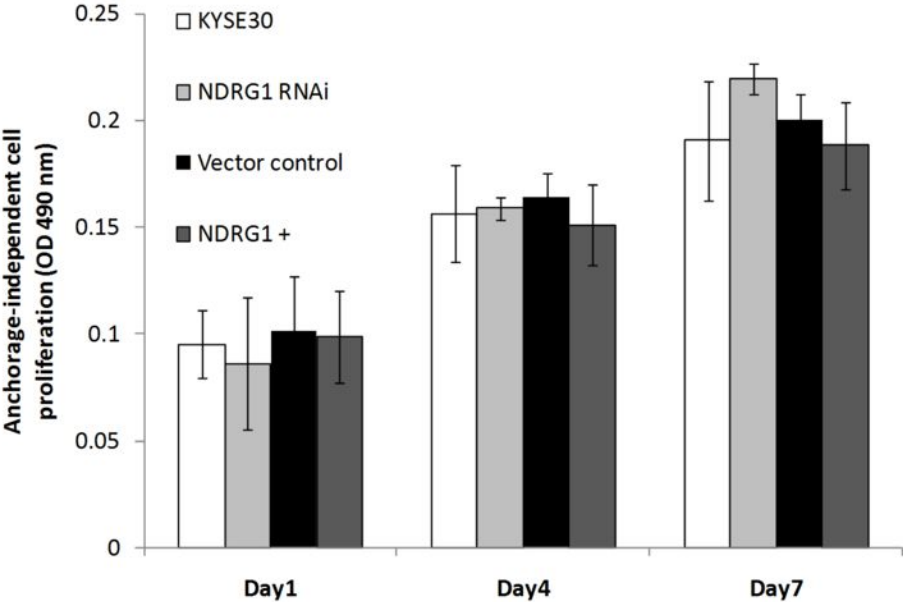

Supplement: cbt-14-164-s01.pdf [file cbt-14-164-s01.pdf]
